# Supplementary material
Source: publisher figshare collection journal article supplement (https://acs.figshare.com/ndownloader/files/5059294)

Supporting Information

## **Nile Red nucleoside: Design of a solvatofluorochromic nucleoside as an indicator of micropolarity around DNA**

*Akimitsu Okamoto,\* Kazuki Tainaka and Yoshimasa Fujiwara*

Department of Synthetic Chemistry and Biological Chemistry, Faculty of Engineering,  
Kyoto University Kyoto 615-8510, Japan

- Copies of  $^1\text{H}/^{13}\text{C}/^{31}\text{P}$  NMR

Page S2, the  $^1\text{H}$  NMR of compound 4.

Page S3, the  $^{13}\text{C}$  NMR of compound 4.

Page S4, the  $^1\text{H}$  NMR of compound 1.

Page S5, the  $^{13}\text{C}$  NMR of compound 1.

Page S6, the  $^1\text{H}$  NMR of the tritylated product of compound 1 (precursor of 5).

Page S7, the  $^{13}\text{C}$  NMR of the tritylated product of compound 1 (precursor of 5).

Page S8, the  $^1\text{H}$  NMR of compound 5.

Page S9, the  $^{13}\text{C}$  NMR of compound 5.

Page S10, the  $^{31}\text{P}$  NMR of compound 5.

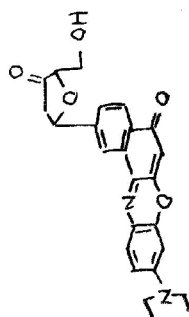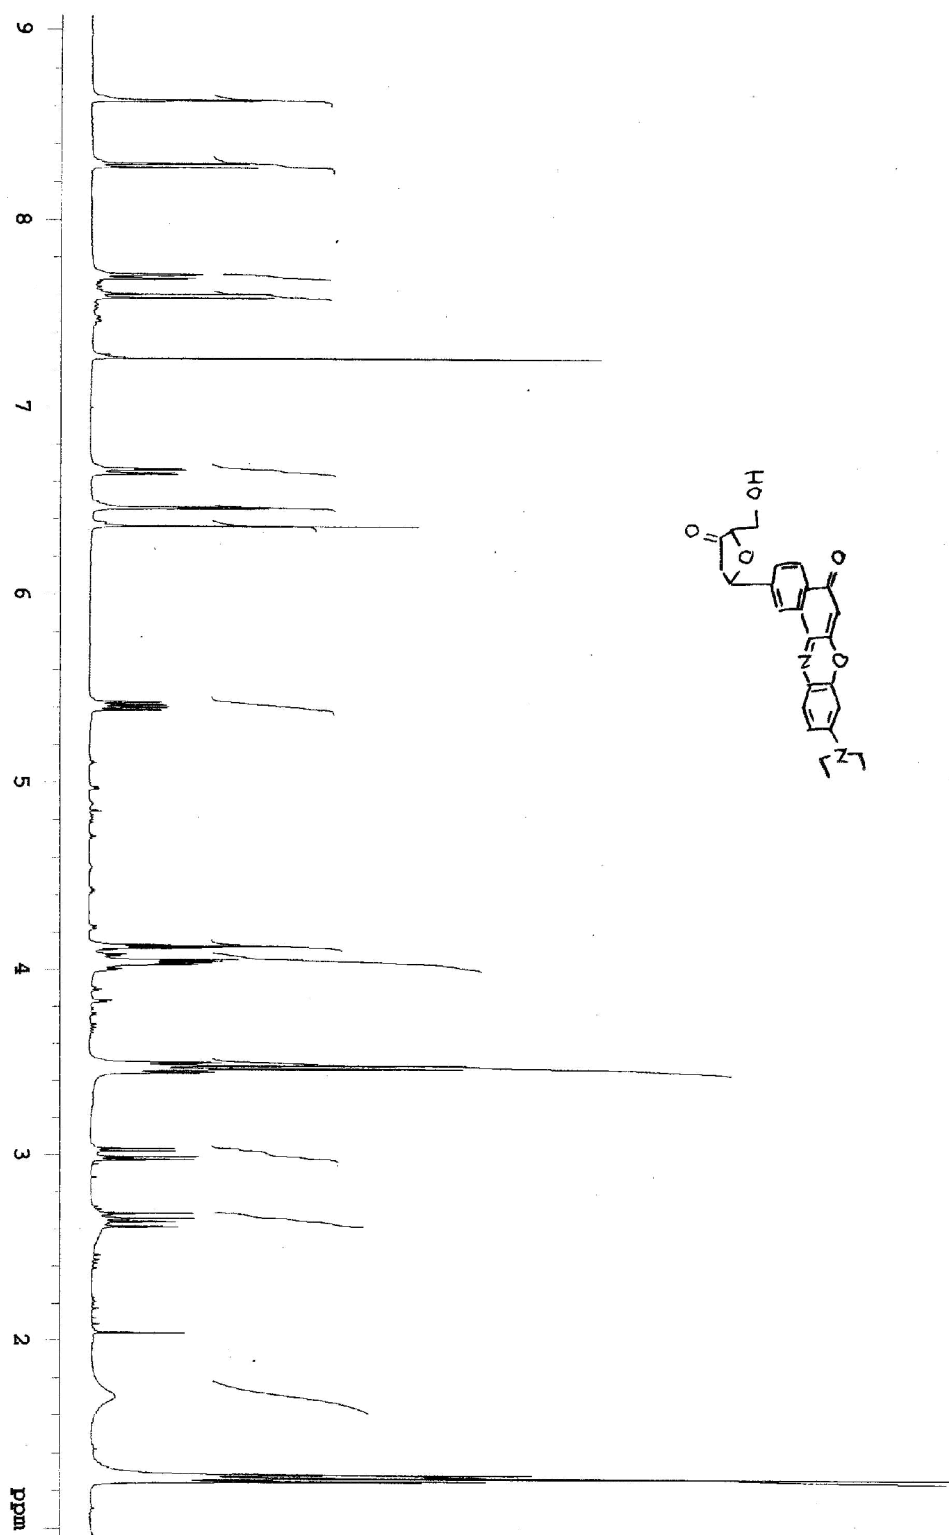

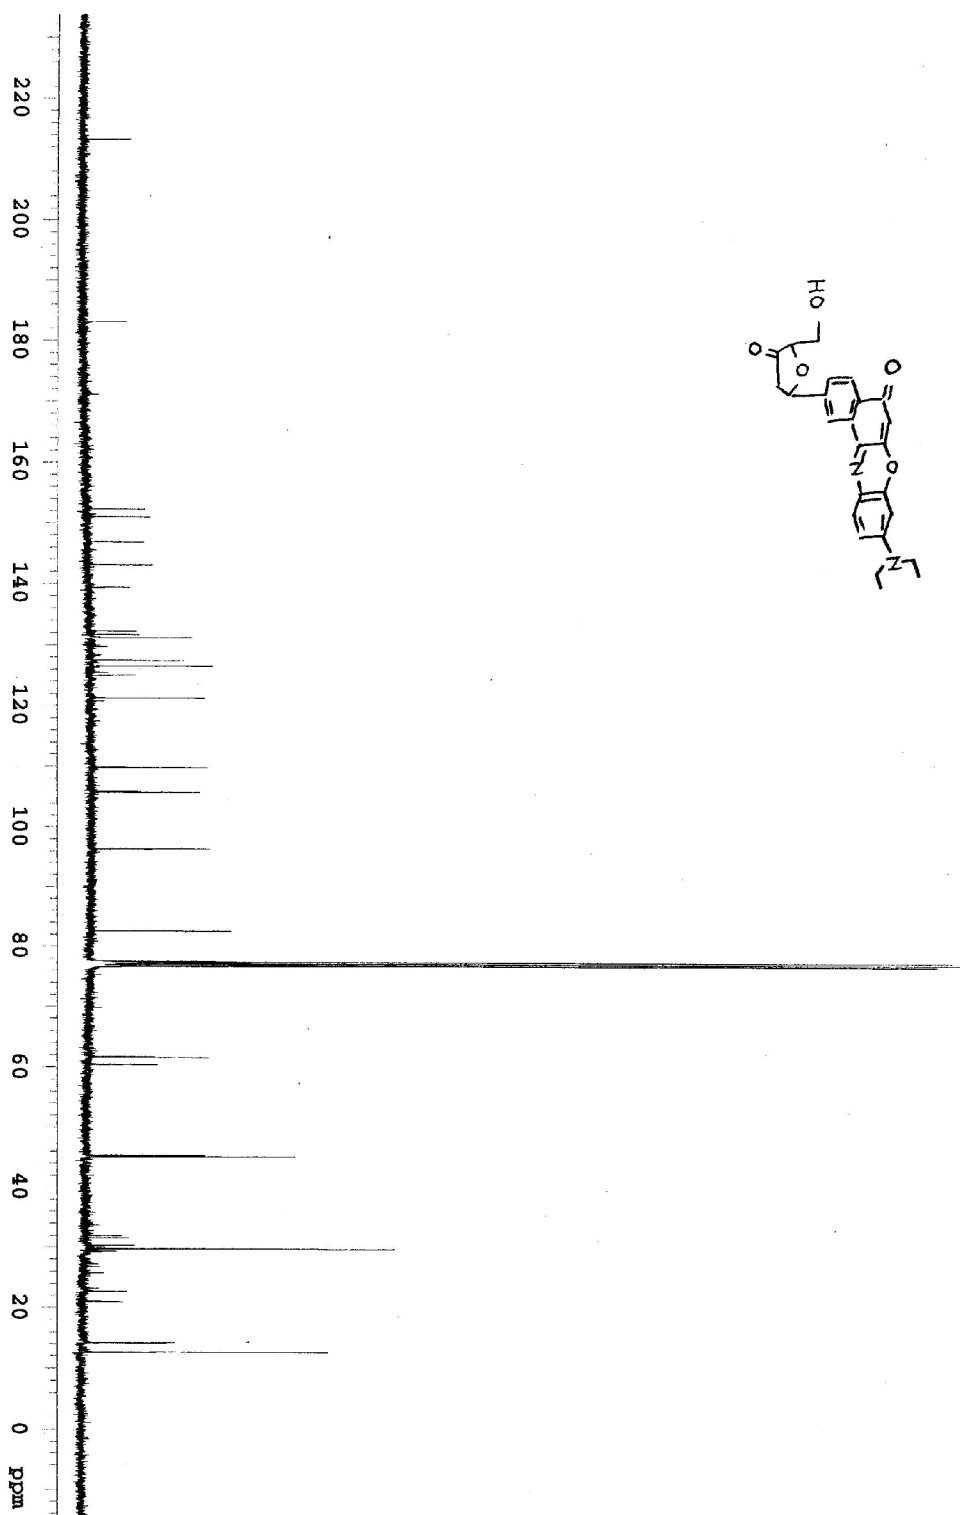

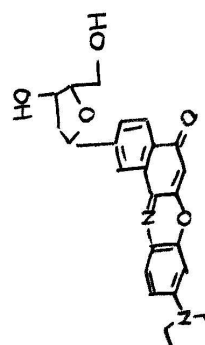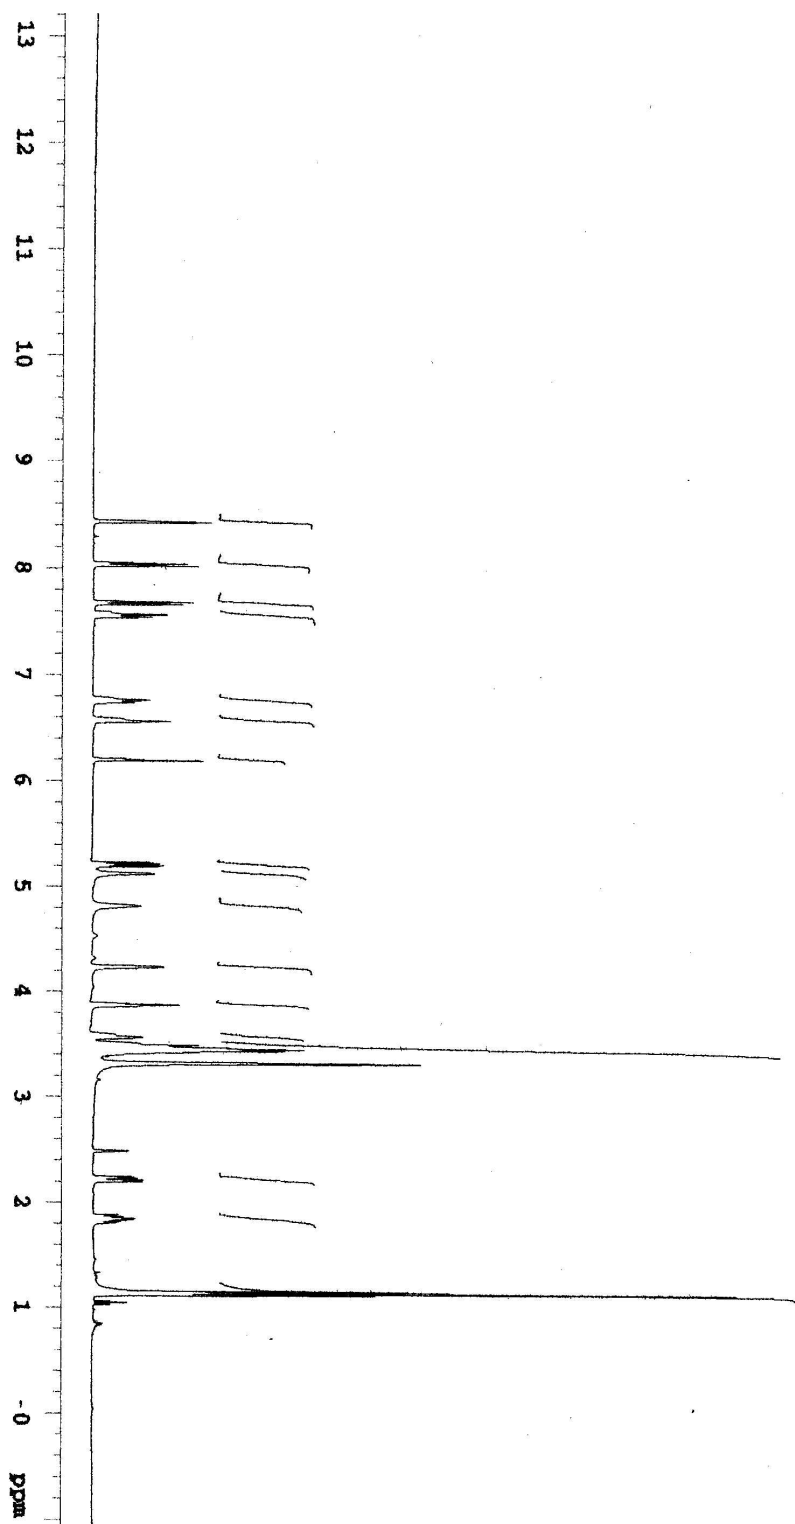

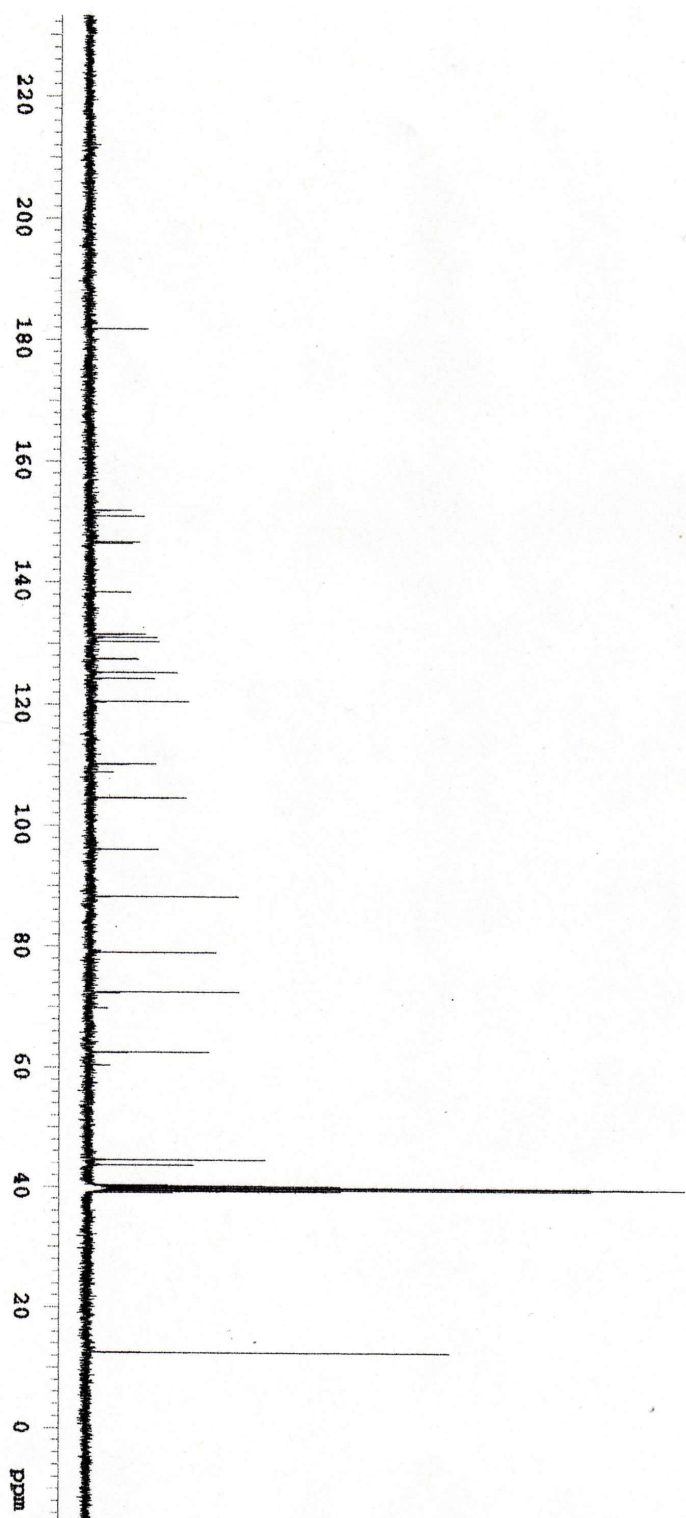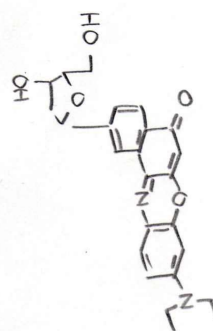

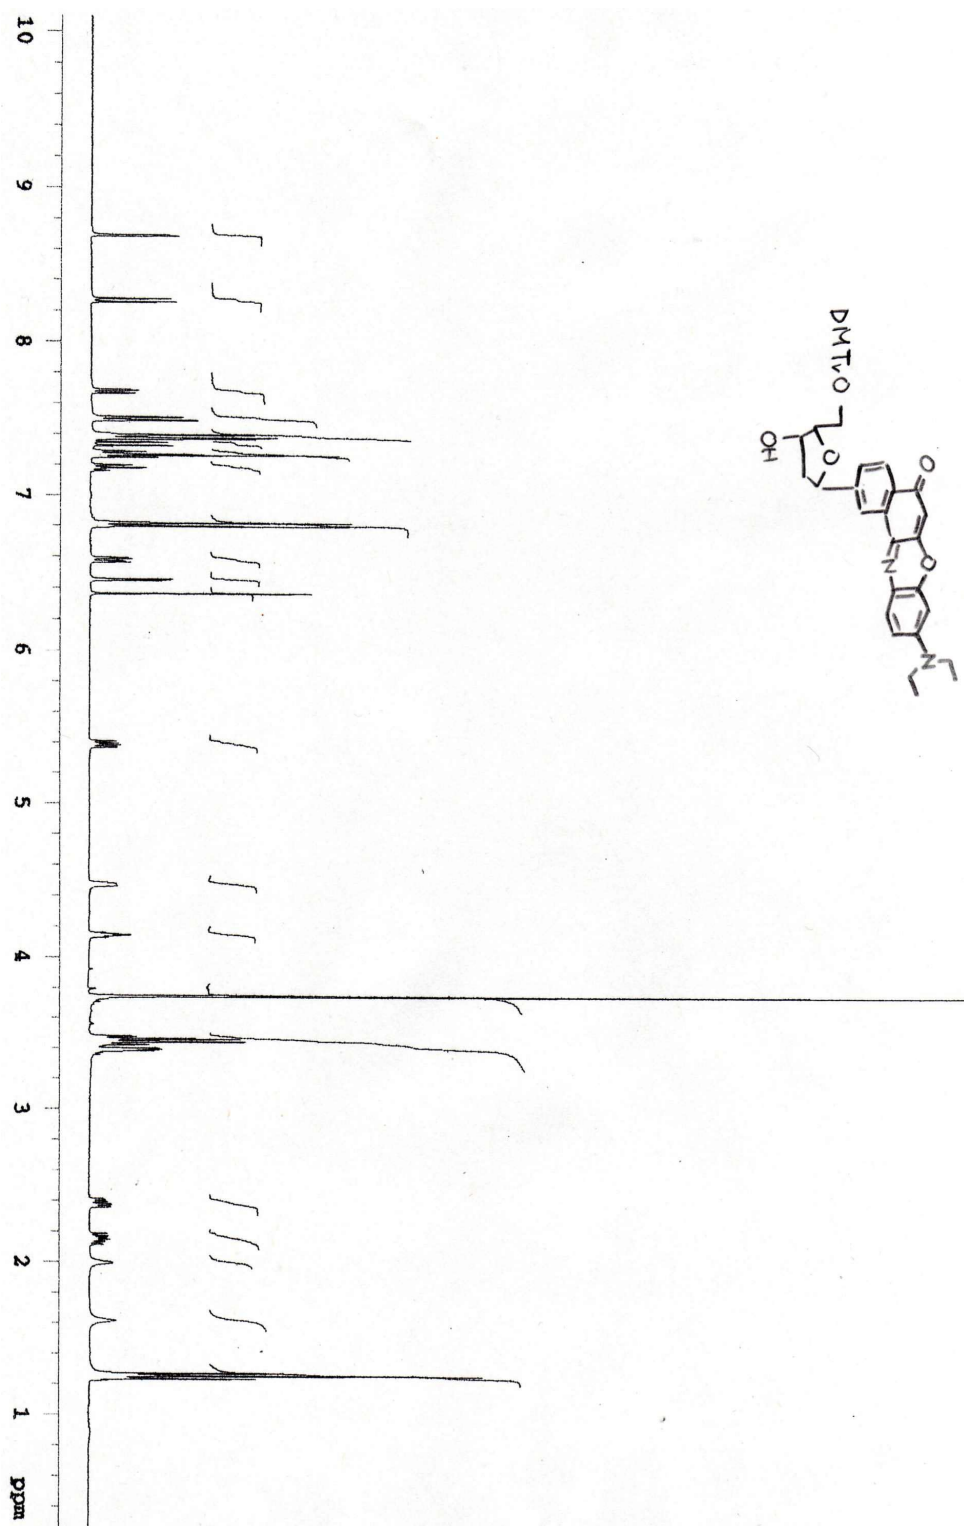

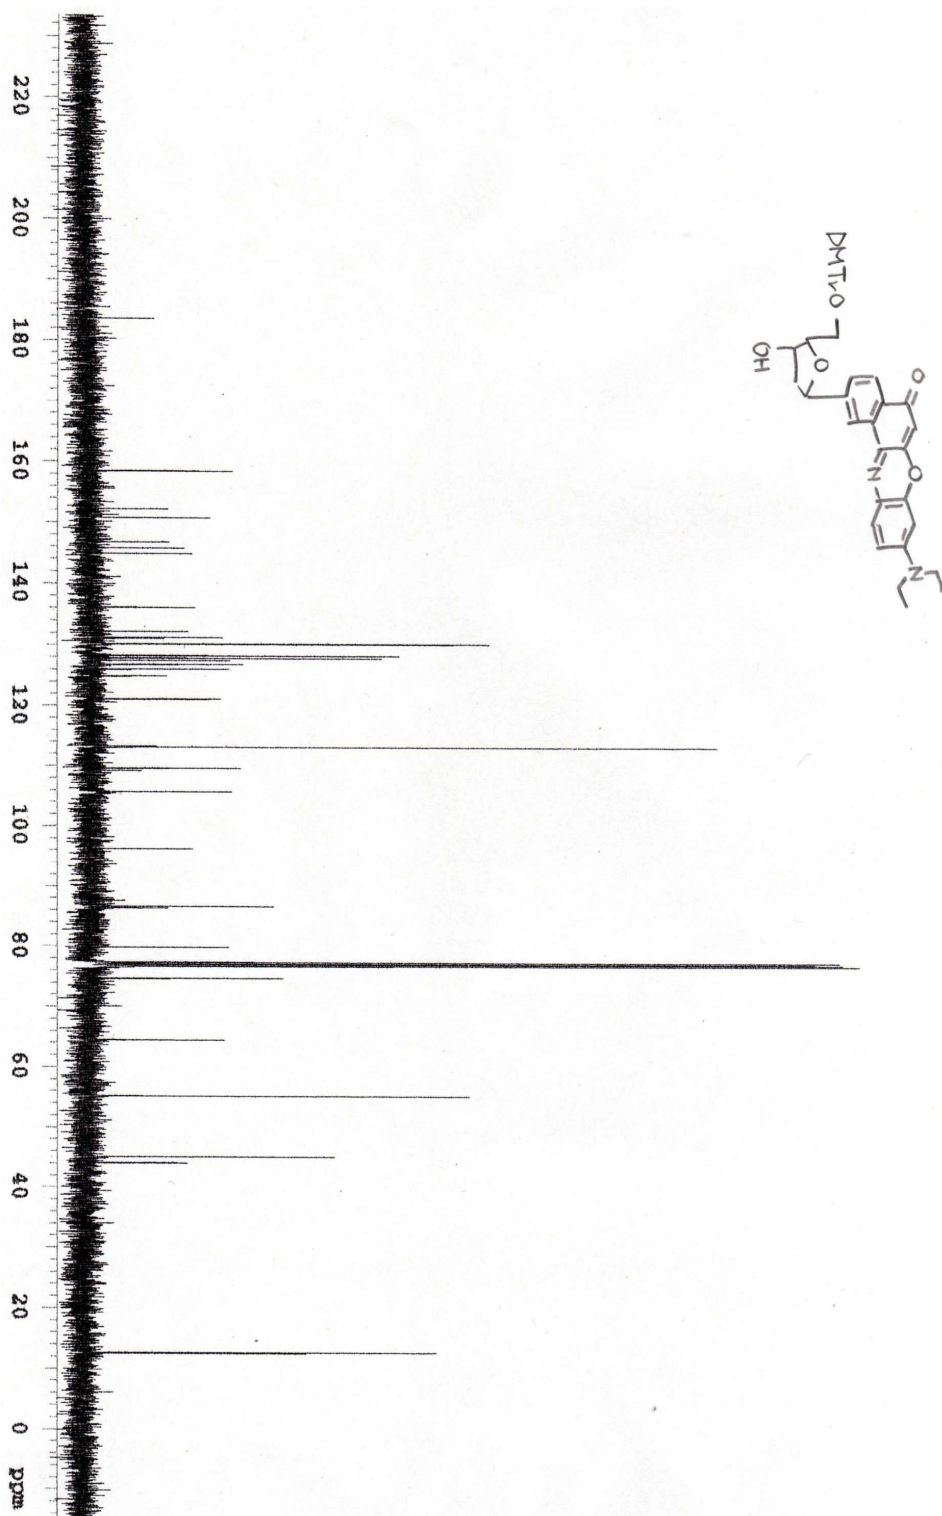

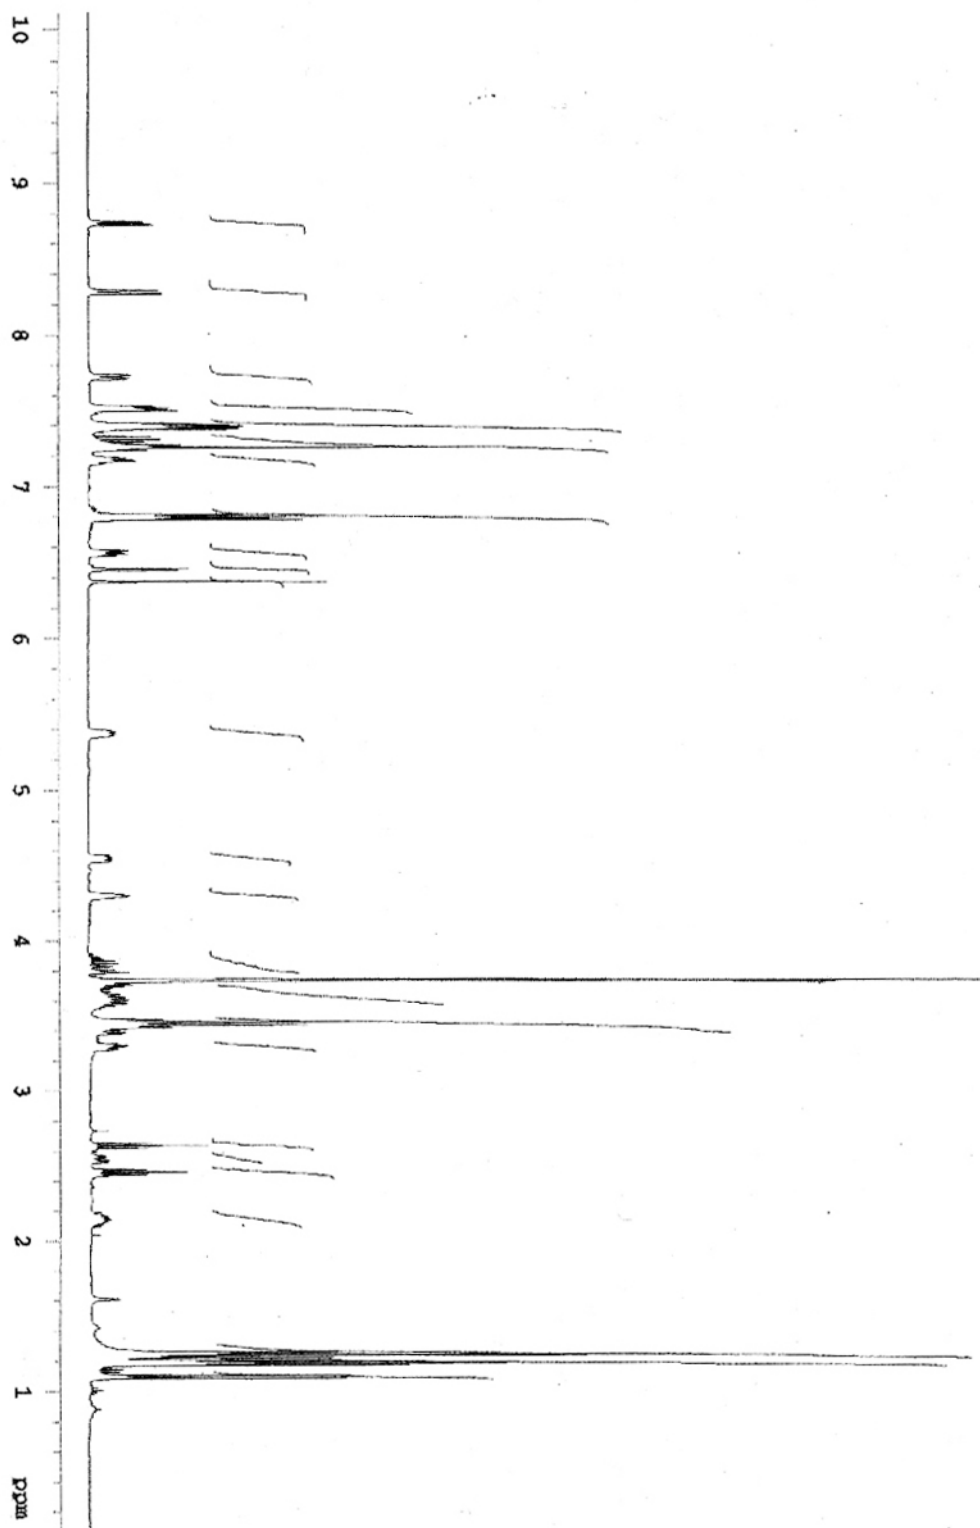



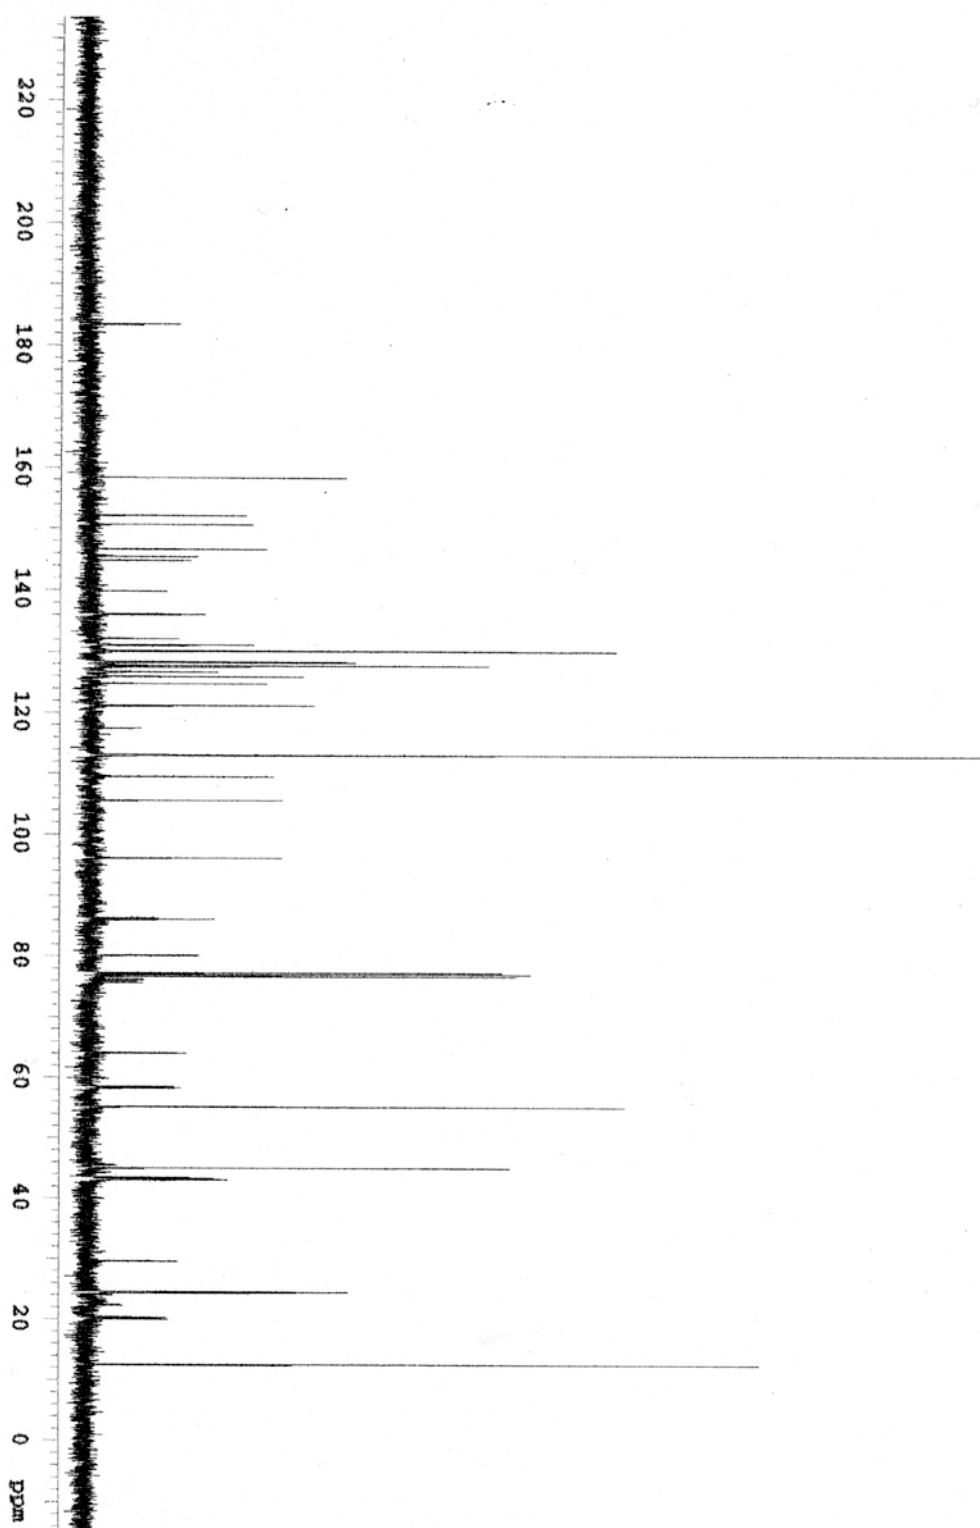

C:\MINIPLAK\Fujitsu\Kai Inaka-IR\_Amide-31PFL.sis

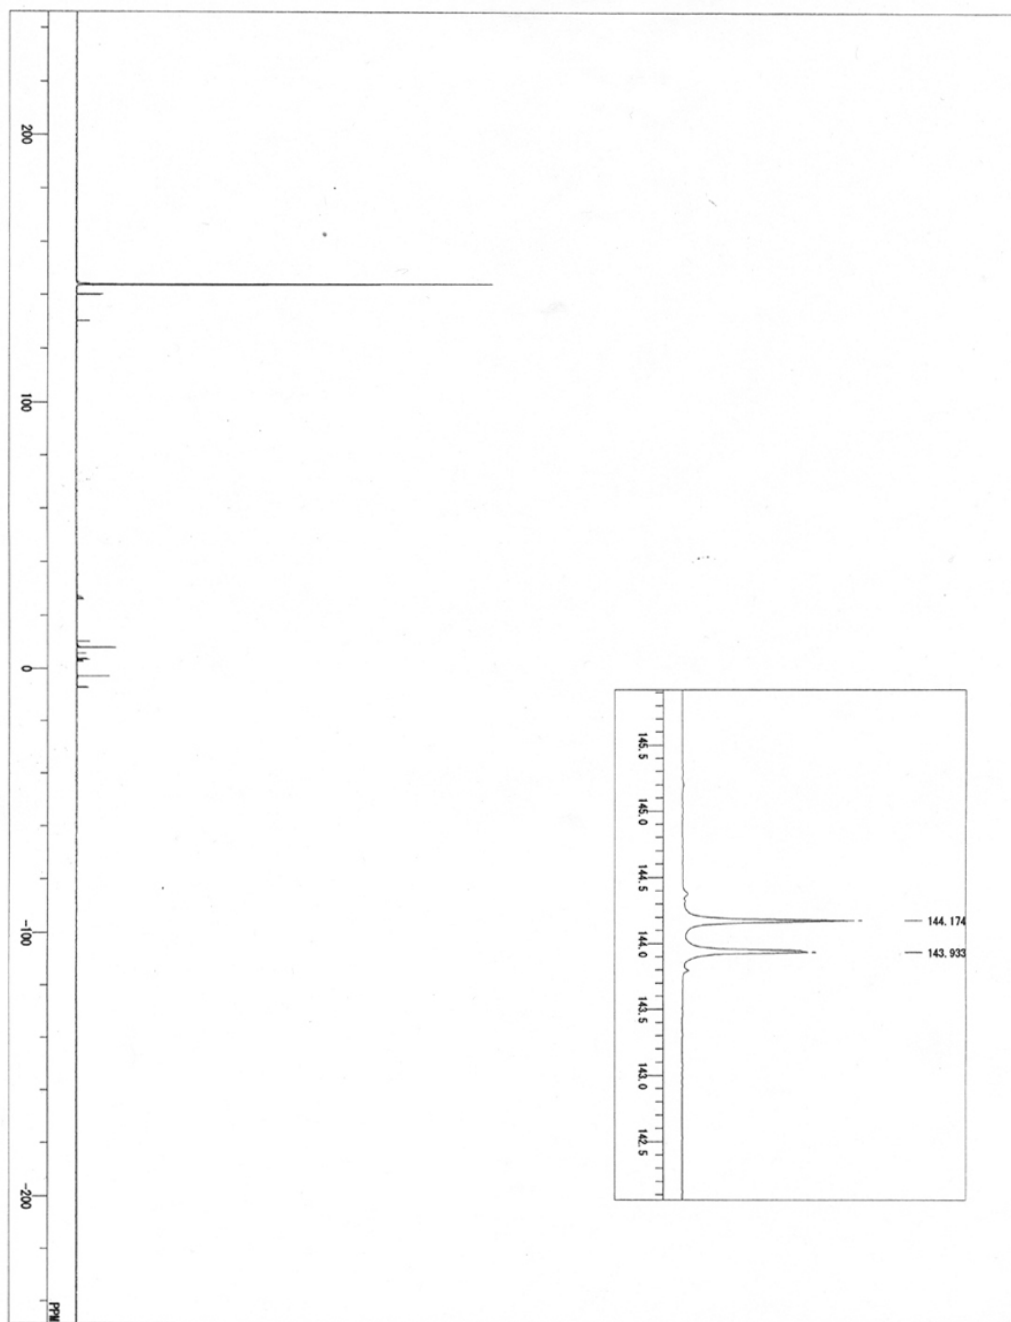

Supplement: Supplementary file 1 [file 5059294]
